# Supplementary material for: Patterned organic layers on gold surfaces prepared by electro-grafting of photolabile-protected aryl diazonium salts
Source: Royal Society of Chemistry journal article supplement (doi:10.1039/d3lf00208j), 2024-01-01
Supplement: d3lf00208j1.pdf [file d3lf00208j1.pdf]

Supplementary Information for

# Patterned Organic Layers on Gold Surfaces Prepared by Electro-grafting of Photolabile-Protected Aryl Diazonium Salts

*Max Taras,<sup>a</sup> Jean-Francois Bergamini,<sup>a</sup> Paula A. Brooksby,<sup>b</sup> Philippe Hapiot,<sup>a</sup> Corinne Lagrost<sup>a,c</sup> and Yann R. Leroux<sup>a</sup>*

<sup>a</sup>Univ Rennes, CNRS, ISCR – UMR 6226, F-35000 Rennes, France

<sup>b</sup> School of Physical and Chemical Sciences and MacDiarmid Institute for Advanced Materials and Nanotechnology,  
University of Canterbury, Christchurch 8041, New Zealand

<sup>c</sup> Univ Rennes, CNRS, UAR ScanMAT 2025, F-35000 Rennes, France

## **Table of contents:**

|                                                           |       |
|-----------------------------------------------------------|-------|
| 1. XPS Survey and high resolution spectra.                | p. S1 |
| 2. RMN spectra of molecules 2 and 3 and aryl diazonium 1. | p. S4 |
| 3. AFM images and line profiles.                          | p. S7 |

## 1. XPS Survey and high resolution spectra.

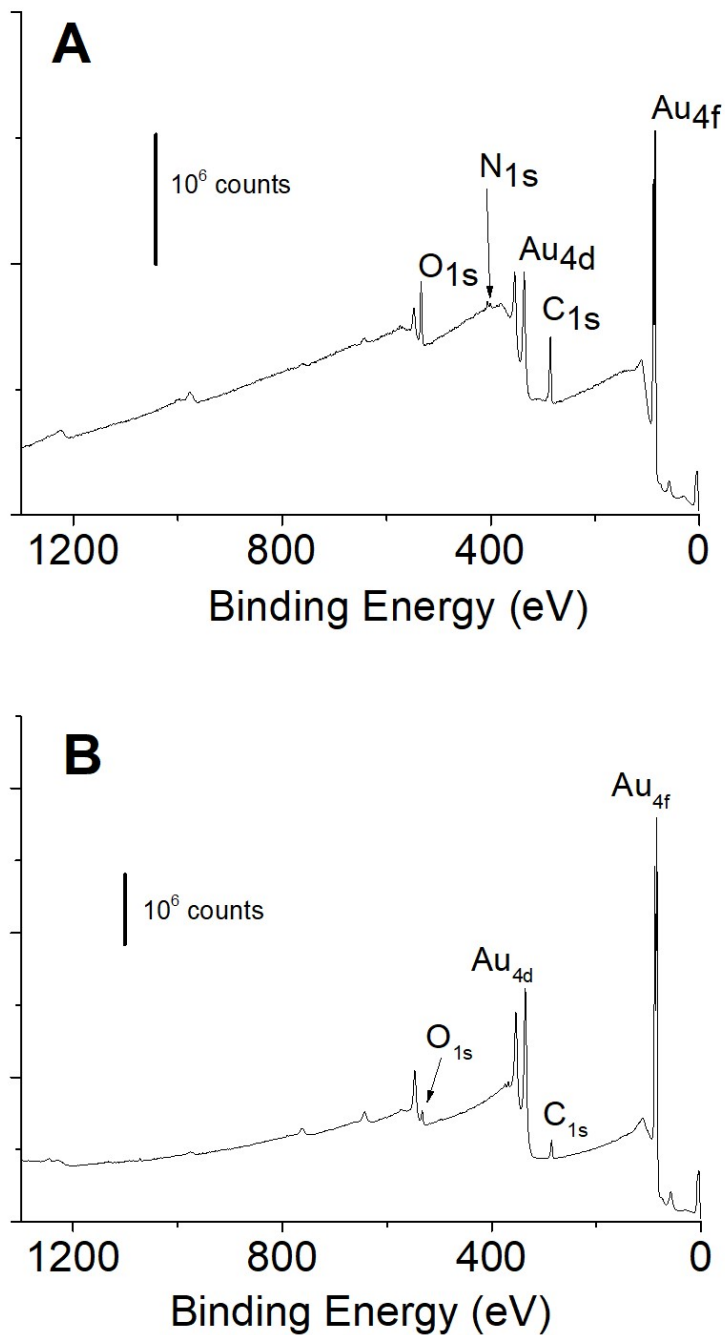

Figure S1. XPS survey spectra of the gold-modified samples with **1** (A) before and (B) after photodeprotection at  $\lambda = 365$  nm for 5 min (power: 40 mW/cm<sup>2</sup>).

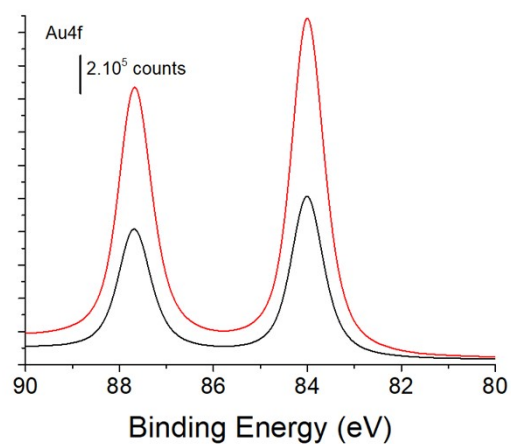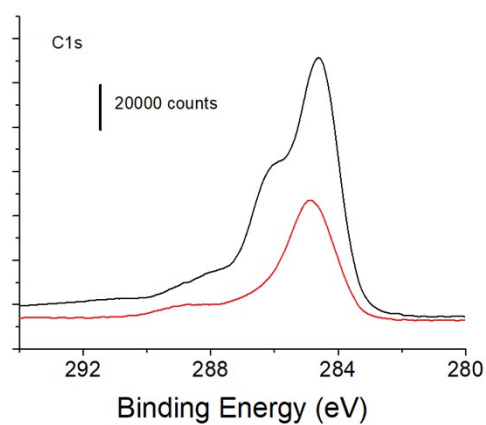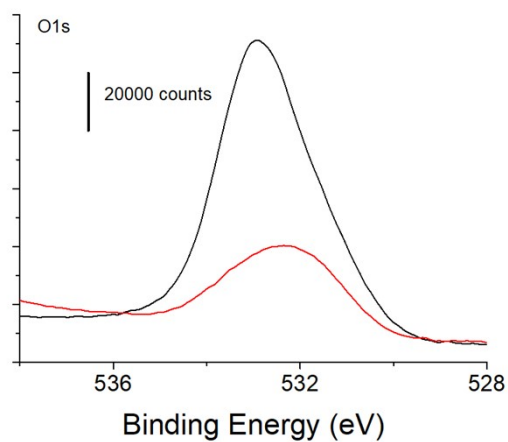

Figure S2. High resolution core level XPS spectra for the Au4f, C1s and O1s regions of gold substrate modified with **1**, before (black line) and after (red line) photo-deprotection at  $\lambda = 365$  nm for 5 min (power: 40 mW/cm<sup>2</sup>).

Table S1. Ratio of atomic percentage determined through survey spectra quantification.

|                    | C/Au            | O/Au            | C/O           |
|--------------------|-----------------|-----------------|---------------|
| Before irradiation | $3.8 \pm 0.2$   | $1.2 \pm 0.1$   | $3.0 \pm 0.1$ |
| After irradiation  | $0.83 \pm 0.02$ | $0.20 \pm 0.02$ | $4.3 \pm 0.3$ |

## 2. RMN spectra of molecules 2 and 3 and aryl diazonium 1.

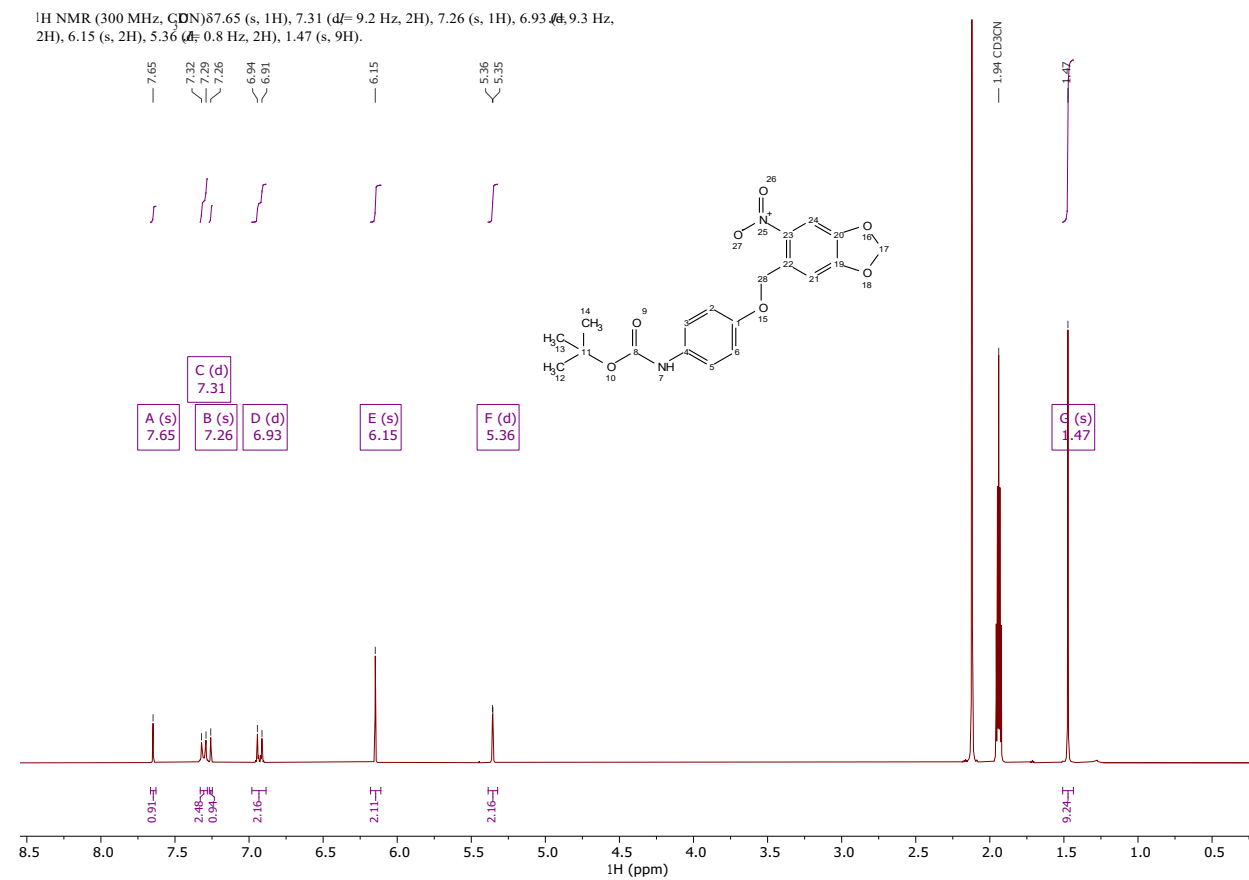

Figure S3. <sup>1</sup>H NMR spectra of O-[1-(6-Nitro-1,3-benzodioxol-5-yl)ethyl]-4-N-Boc-aminophenol (2).

<sup>1</sup>H NMR (300 MHz, CDCl<sub>3</sub>) δ 7.63 (s, 1H), 7.26 (t, 0.8 Hz, 1H), 6.80 – 6.74 (m, 2H), 6.62 – 6.55 (m, 2H), 6.14 (s, 2H), 5.28 (d, 0.8 Hz, 2H).

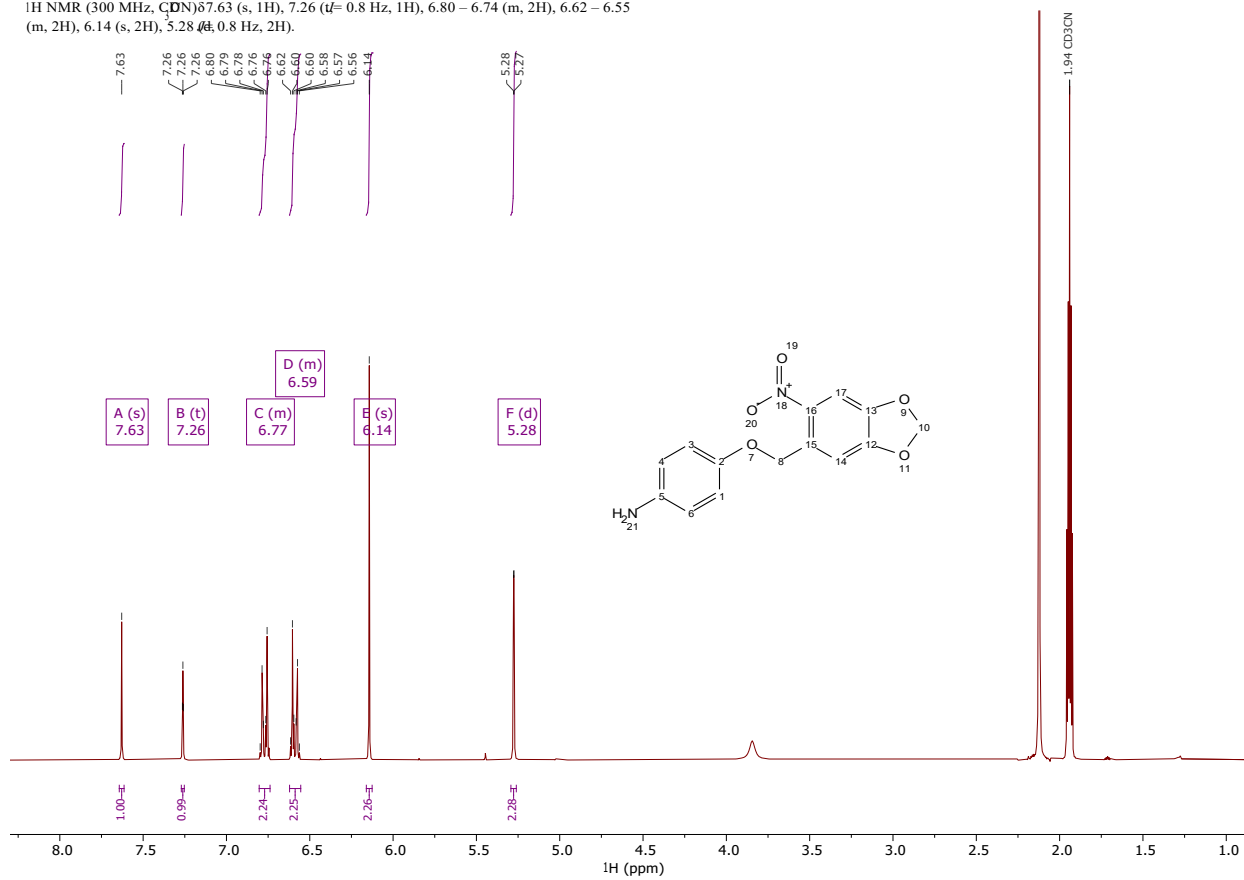

Figure S4. <sup>1</sup>H NMR spectra of O-[1-(6-Nitro-1,3-benzodioxol-5-yl)ethyl]-aminophenol (3).

<sup>1</sup>H NMR (300 MHz, CDCl<sub>3</sub>) δ 8.41 (d, J = 9.4 Hz, 2H), 7.72 (s, 1H), 7.46 (t, J = 9.5 Hz, 2H), 7.25 (s, 1H), 6.19 (s, 2H), 5.66 (s, 2H).

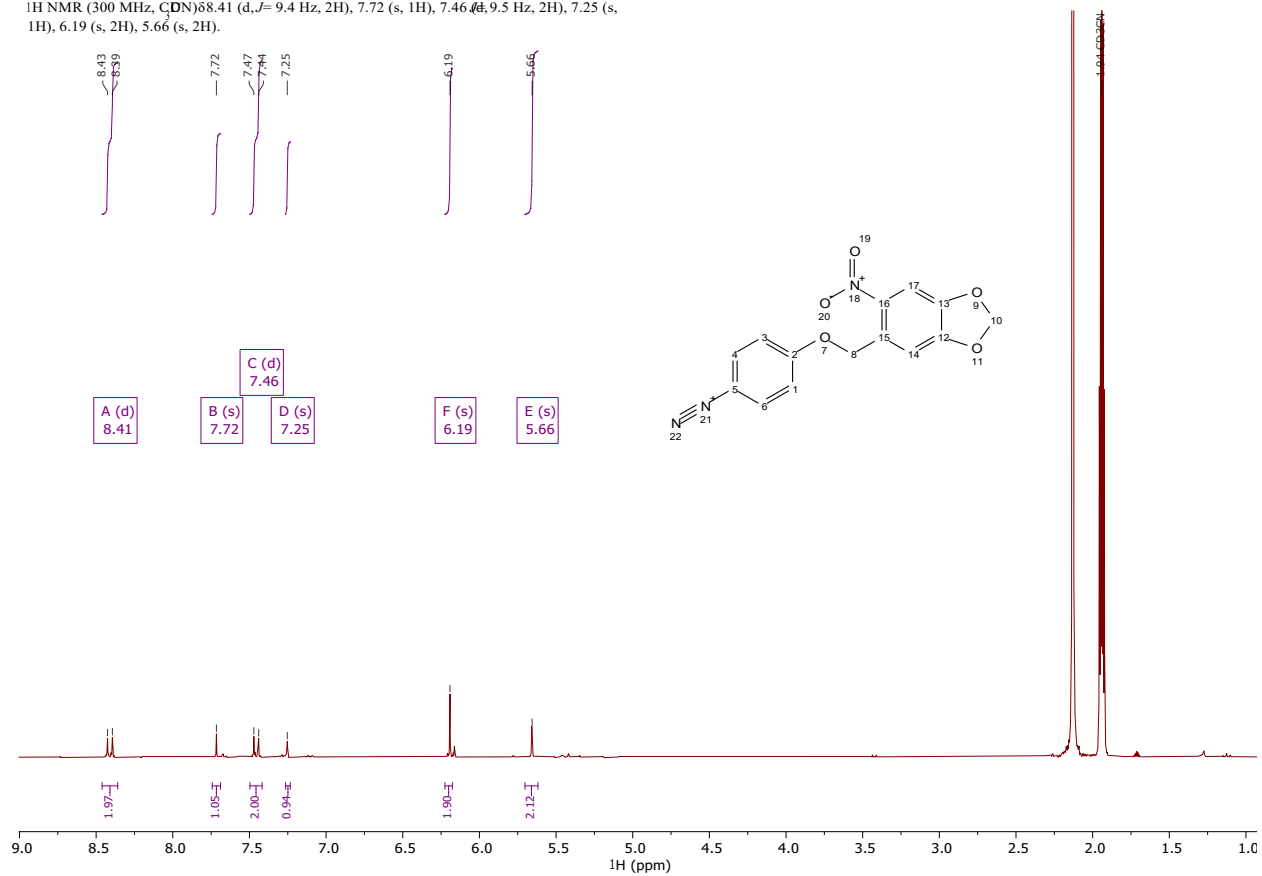

Figure S5. <sup>1</sup>H NMR spectra of O-[1-(6-Nitro-1,3-benzodioxol-5-yl)ethyl]-hydroxybenzene diazonium tetrafluoroborate (1).

### 3. AFM images and line profiles.

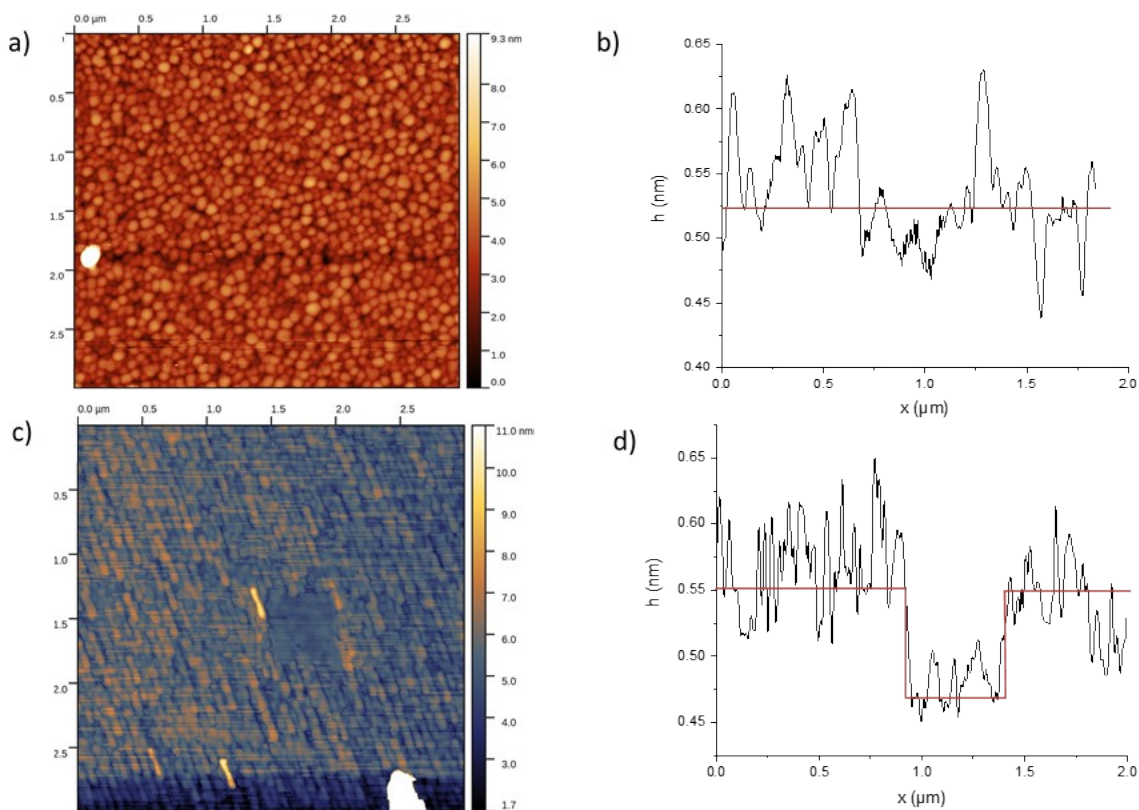

Figure S6. a)  $3 \times 3 \mu\text{m}^2$  AFM image of a bare gold substrate. b) Line profile (black) and average height profile curve (red) for image presented in Figure S6a. c)  $3 \times 3 \mu\text{m}^2$  AFM image of a bare gold substrate, showing a  $0.5 \times 0.5 \mu\text{m}^2$  scratch. d) Line profile (black) and average height profile curve (red) for image presented in Figure S6c.



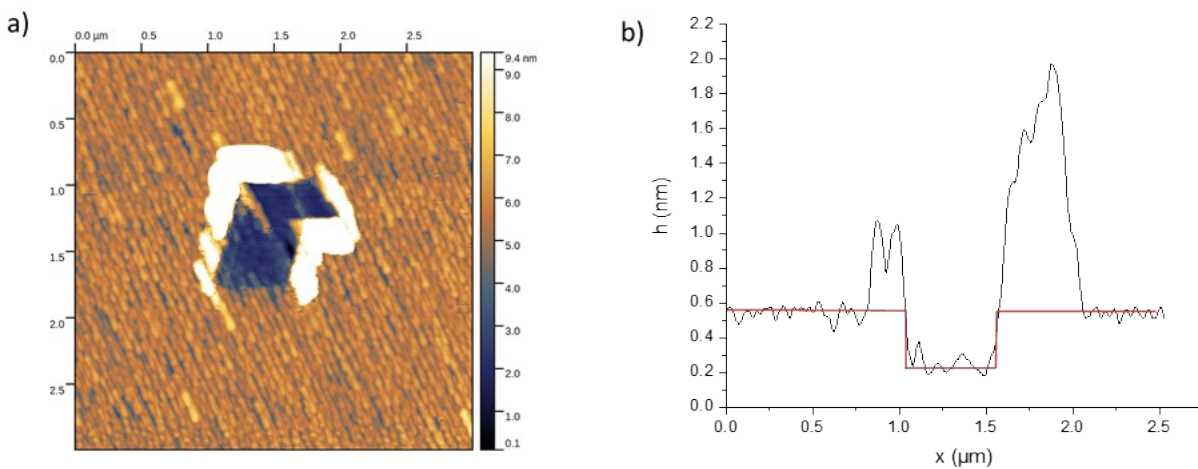

Figure S7. a) 3 x 3 μm<sup>2</sup> AFM image of a gold substrate modified with *o*-[1-(6-nitro-1,3-benzodioxol-5-yl)ethyl]-hydroxybenzene diazonium tetrafluoroborate salt showing a 1 x 1 μm<sup>2</sup> scratch. b) Line profile (black) of the scratch and average height profile curve (red) for image presented in Figure S7a.

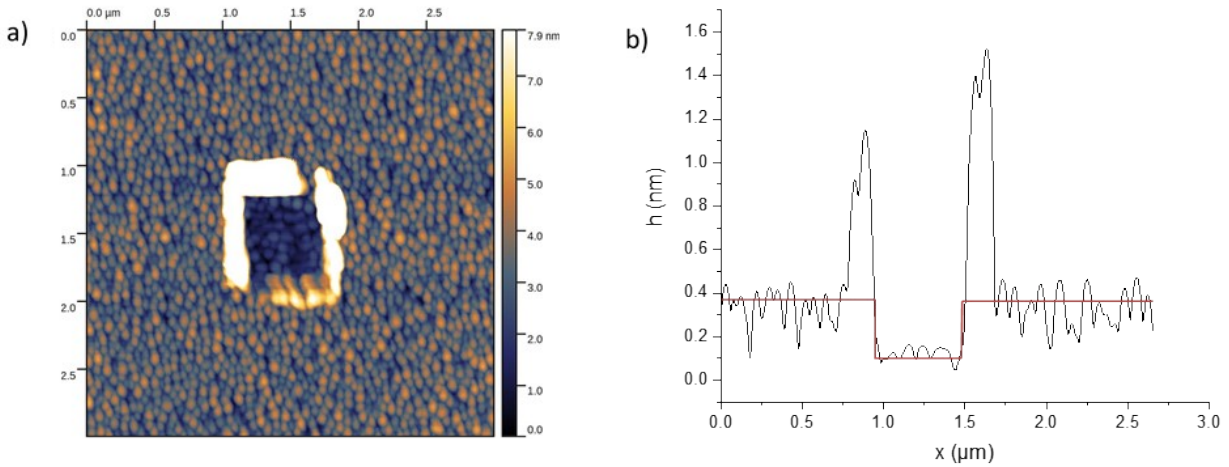

Figure S8. a) 3 x 3  $\mu\text{m}^2$  AFM image of a gold substrate modified with o-[1-(6-nitro-1,3-benzodioxol-5-yl)ethyl]-hydroxybenzene diazonium tetrafluoroborate salt after irradiation at 365 nm and elimination of the photolabile protective group, showing a 1 x 1  $\mu\text{m}^2$  scratch. b) Line profile (black) of the scratch and average height profile curve (red) for image presented in Figure S8a.
